# Supplementary material for: Influence of Parameters on the Death Pathway of Gastric Cells Induced by Gold Nanosphere Mediated Phototherapy
Source: MDPI journal article supplement (doi:10.3390/nano12040646), 2022-02-15
Supplement: s1 [file s1]

## Supplementary Materials

### Influence of parameters on the death pathway of gastric cells induced by gold nanosphere mediated phototherapy

Jing Xin, Lei Fu, Jing Wang, Sijia Wang, Luwei Zhang, Zhenxi Zhang\*, Cuiping Yao\*

Xi'an Jiaotong University, School of Life Science and Technology, Institute of Biomedical

Photonics and Sensing, Key Laboratory of Biomedical Information Engineering of

Ministry of Education, Xi'an, Shaanxi, China

\* Correspondence: Tel: 82663286-83; Fax 82663286-83

E-mail addresses: zsyxp@mail.xjtu.edu.cn

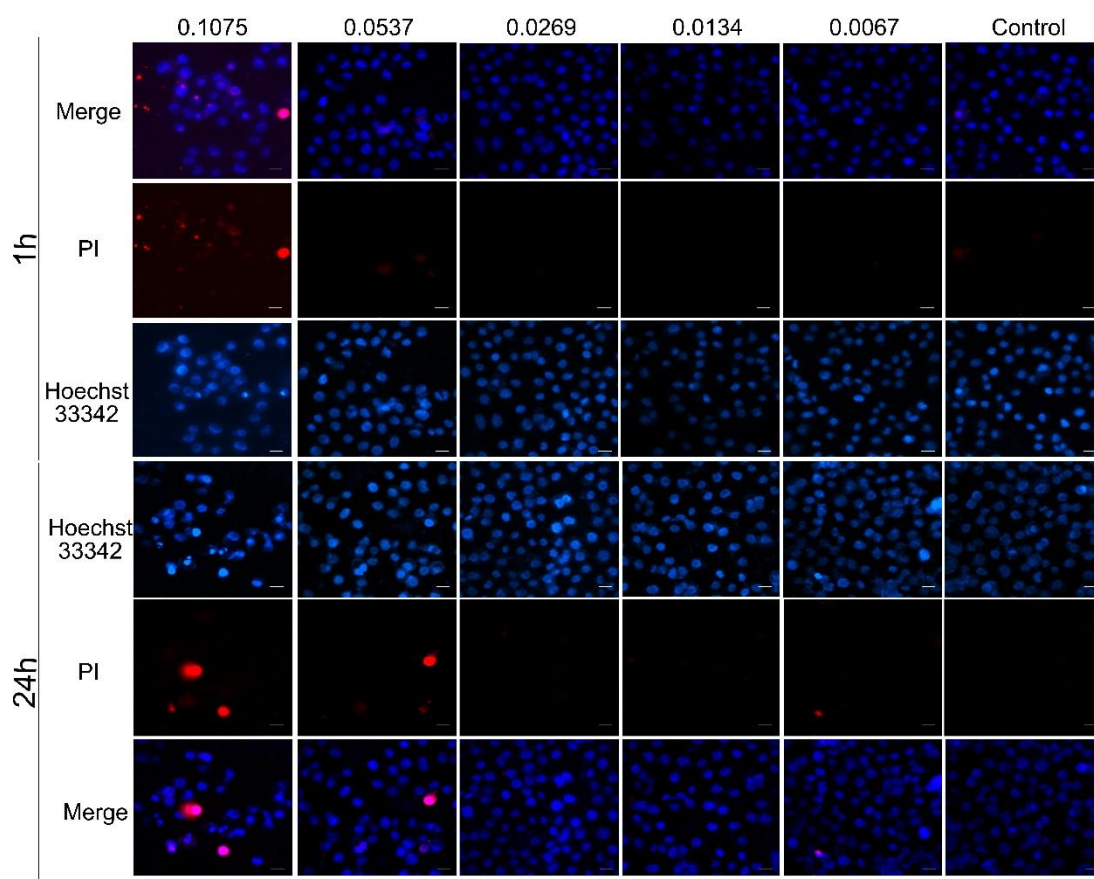

**Figure S1.** Apoptosis and necrosis induced by PEG-AuS irradiated with nanosecond laser at 4 h incubation time and 11.47 mJ/cm<sup>2</sup> irradiation dosage.

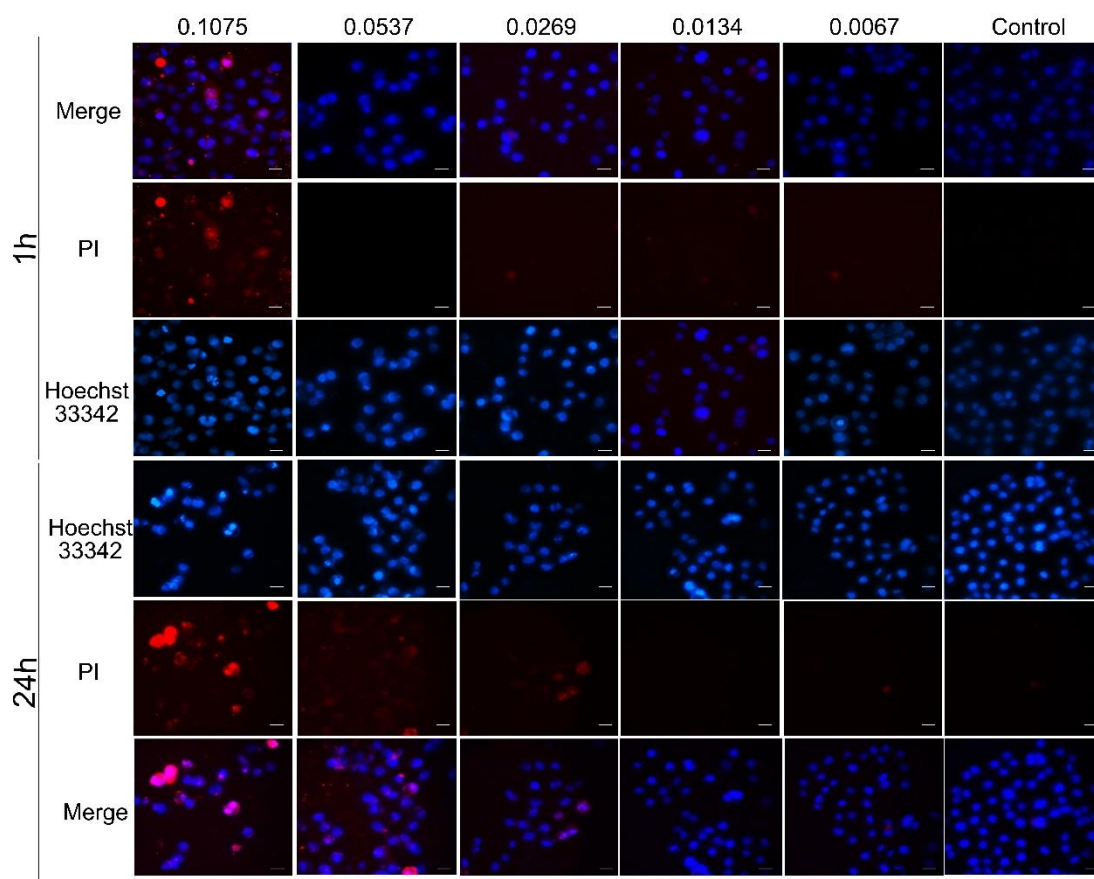

**Figure S2.** Apoptosis and necrosis induced by PEG-AuS irradiated with nanosecond laser at 4 h incubation time and 22.93 mJ/cm<sup>2</sup> irradiation dosage.

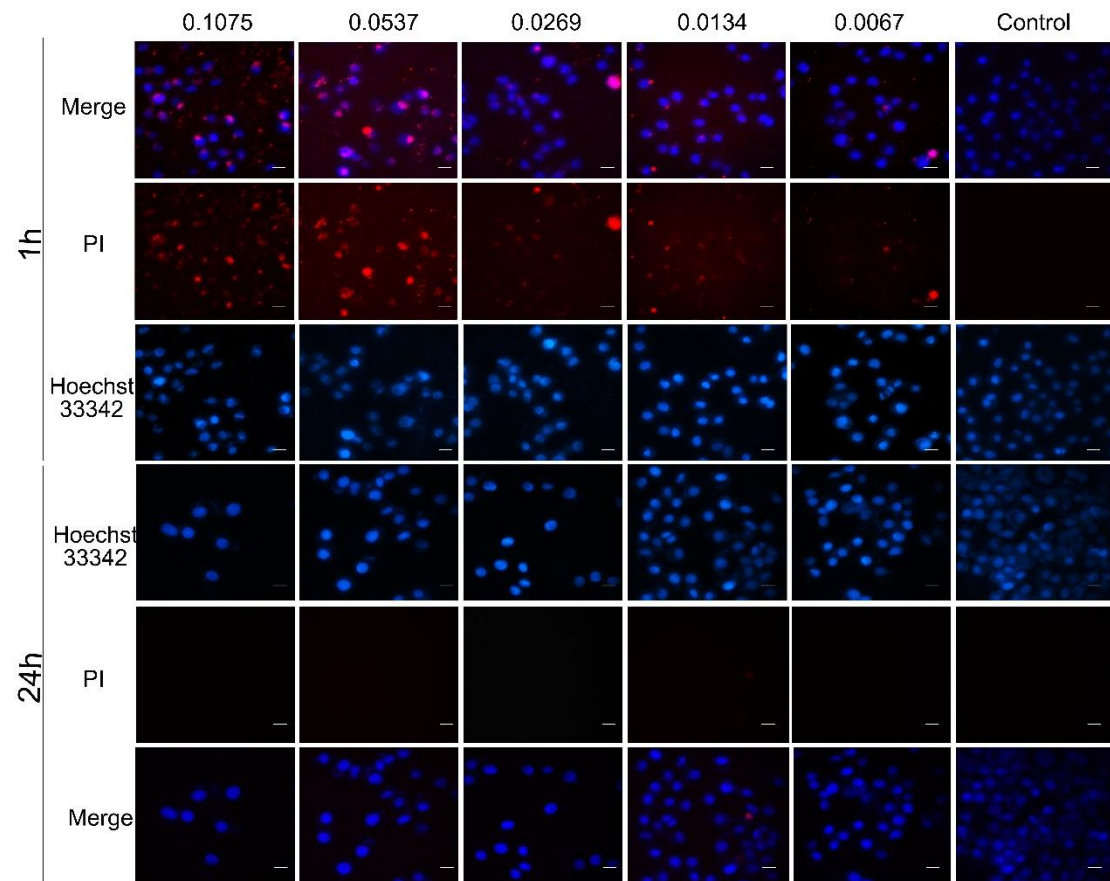

**Figure S3.** Apoptosis and necrosis induced by PEG-AuS irradiated with nanosecond laser at 6 h incubation time and 11.47 mJ/cm<sup>2</sup> irradiation dosage.

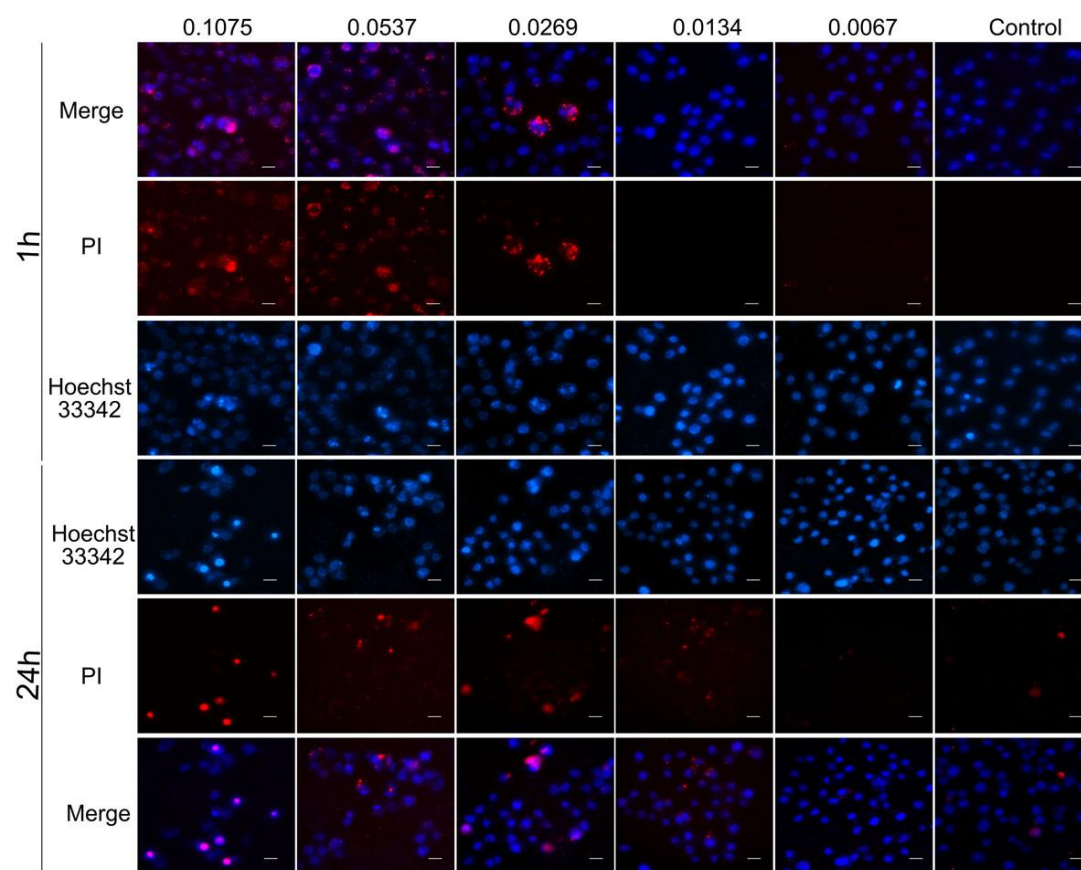

**Figure S4.** Apoptosis and necrosis induced by PEG-AuS irradiated with nanosecond laser at 6h incubation time and 22.93 mJ/cm<sup>2</sup> irradiation dosage.

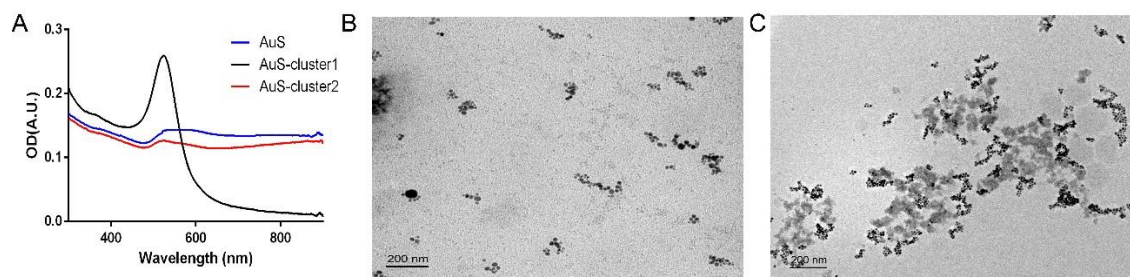

**Figure S5.** Properties of AuS cluster. Notes: (A)UV-vis absorption spectra of AuS and AuS cluster. (B, C) Transmission electron microscopy images of cluster 1 and cluster 2.
